# Supplementary material for: Sedative and Anxiolytic Activities of Opuntia ficus indica (L.) Mill.: An Experimental Assessment in Mice
Source: PubMed Central journal article supplement (PMC7221559; doi:10.3390/molecules25081844), 2020-04-16
Supplement: molecules-25-01844-s001.pdf [file molecules-25-01844-s001.pdf]

<sup>1</sup>H and <sup>13</sup>C-NMR data of compound **1**, **2**, **3**, and **4**

| C/H                       | 1                                       |            | 2                                       |            | 3                                       |            | 4                                       |            |
|---------------------------|-----------------------------------------|------------|-----------------------------------------|------------|-----------------------------------------|------------|-----------------------------------------|------------|
|                           | $\delta_H$ (mult., int., <i>J</i> (Hz)) | $\delta_C$ | $\delta_H$ (mult., int., <i>J</i> (Hz)) | $\delta_C$ | $\delta_H$ (mult., int., <i>J</i> (Hz)) | $\delta_C$ | $\delta_H$ (mult., int., <i>J</i> (Hz)) | $\delta_C$ |
| <b>2</b>                  | -                                       | 158.8      | -                                       | 158.7      | -                                       | 158.5      | -                                       | 158.6      |
| <b>3</b>                  | -                                       | 134.9      | -                                       | 135.2      | -                                       | 135.0      | -                                       | 135.3      |
| <b>4</b>                  | -                                       | 179.1      | -                                       | 179.2      | -                                       | 179.4      | -                                       | 179.3      |
| <b>5</b>                  | -                                       | 163.2      | -                                       | 163.1      | -                                       | 163.0      | -                                       | 163.1      |
| <b>6</b>                  | 6.16 (bs, 1H)                           | 100.1      | 6.17 (bs, 1H)                           | 100.0      | 6.18 (bs, 1H)                           | 100.3      | 6.18 (bs, 1H)                           | 100.1      |
| <b>7</b>                  | -                                       | 165.9      | -                                       | 166.0      | -                                       | 166.0      | -                                       | 166.2      |
| <b>8</b>                  | 6.32 (bs, 1H)                           | 94.7       | 6.37 (bs, 1H)                           | 94.9       | 6.37 (bs, 1H)                           | 94.9       | 6.37 (bs, 1H)                           | 95.0       |
| <b>9</b>                  | -                                       | 158.5      | -                                       | 158.5      | -                                       | 158.7      | -                                       | 159.0      |
| <b>10</b>                 | -                                       | 105.8      | -                                       | 105.8      | -                                       | 105.7      | -                                       | 105.6      |
| <b>1'</b>                 | -                                       | 123.0      | -                                       | 123.1      | -                                       | 123.0      | -                                       | 122.8      |
| <b>2'</b>                 | 7.95 (d, 1H, 2.0 Hz)                    | 114.1      | 7.95 (d, 1H, 2.0 Hz)                    | 114.3      | 7.92 (d, 1H, 2.0 Hz)                    | 114.2      | 8.05 (d, 1H, 8.6 Hz)                    | 132.3      |
| <b>3'</b>                 | -                                       | 148.2      | -                                       | 148.3      | -                                       | 148.1      | 6.89 (d, 1H, 8.6 Hz)                    | 116.1      |
| <b>4'</b>                 | -                                       | 150.6      | -                                       | 150.8      | -                                       | 151.0      | -                                       | 161.5      |
| <b>5'</b>                 | 6.86 (d, 1H, 8.3 Hz)                    | 115.9      | 6.87 (d, 1H, 8.5 Hz)                    | 116.0      | 6.89 (d, 1H, 8.5 Hz)                    | 116.2      | 6.89 (d, 1H, 8.6 Hz)                    | 116.1      |
| <b>6'</b>                 | 7.57 (dd, 1H, 8.3/2.0 Hz)               | 123.4      | 7.58 (dd, 1H, 8.5/2.0 Hz)               | 123.8      | 7.57 (dd, 1H, 8.5/2.0 Hz)               | 123.5      | 8.05 (d, 1H, 8.6 Hz)                    | 132.3      |
| <b>3'-OCH<sub>3</sub></b> | 3.91 (s, 3H)                            | 56.2       | 3.93 (s, 3H)                            | 56.3       | 3.94 (s, 3H)                            | 56.6       | -                                       | -          |
| <b>1''</b>                | -                                       | -          | 5.42 (d, 1H, 7.3 Hz)                    | 103.6      | 5.40 (d, 1H, 7.3 Hz)                    | 102.8      | 5.24 (d, 1H, 7.2 Hz)                    | 104.1      |
| <b>2''</b>                | -                                       | -          | -                                       | 75.7       | -                                       | 75.9       | -                                       | 75.9       |
| <b>3''</b>                | -                                       | -          | -                                       | 78.4       | -                                       | 78.3       | -                                       | 78.5       |
| <b>4''</b>                | -                                       | -          | 3.78-3.17                               | 71.3       | 3.78-3.17                               | 71.2       | 3.78-3.17                               | 71.5       |
| <b>5''</b>                | -                                       | -          | -                                       | 78.0       | -                                       | 77.9       | -                                       | 78.0       |
| <b>6''</b>                | -                                       | -          | -                                       | 62.5       | -                                       | 62.3       | -                                       | 62.6       |
| <b>1'''</b>               | -                                       | -          | -                                       | -          | 4.52 (bs, 1H)                           | 102.3      | 4.52 (bs, 1H)                           | 102.4      |
| <b>2'''</b>               | -                                       | -          | -                                       | -          | -                                       | 72.0       | -                                       | 72.2       |
| <b>3'''</b>               | -                                       | -          | -                                       | -          | -                                       | 72.1       | -                                       | 72.0       |
| <b>4'''</b>               | -                                       | -          | -                                       | -          | 3.84-3.22                               | 73.7       | 3.84-3.22                               | 73.8       |
| <b>5'''</b>               | -                                       | -          | -                                       | -          | -                                       | 69.5       | -                                       | 69.7       |
| <b>6'''</b>               | -                                       | -          | -                                       | -          | 1.10 (d, 3H, 6.2 Hz)                    | 17.4       | 1.13 (d, 3H, 6.2 Hz)                    | 17.9       |

Mult.: multiplicity of the NMR signal; int: integral of the NMR signal (showing the number of H); J: coupling constant; bs: broad singlet; d: doublet
